# Supplementary material
Source: PubMed Central journal article supplement (PMC6990766)
Supplement: jamaotolaryngolheadnecksurg-146-160-s001.pdf [file jamaotolaryngolheadnecksurg-146-160-s001.pdf]

## Supplementary Online Content

Campbell BR, Shinn JR, Kimura KS, et al. Unilateral vocal fold immobility after prolonged endotracheal intubation. *JAMA Otolaryngol Head Neck Surg*.

Published online December 19, 2019. doi:10.1001/jamaoto.2019.3969

**eFigure.** CONSORT Diagram

**eTable 1.** Cohort Characteristics

**eTable 2.** Cohort Health Status and Comorbid Disease

This supplementary material has been provided by the authors to give readers additional information about their work.

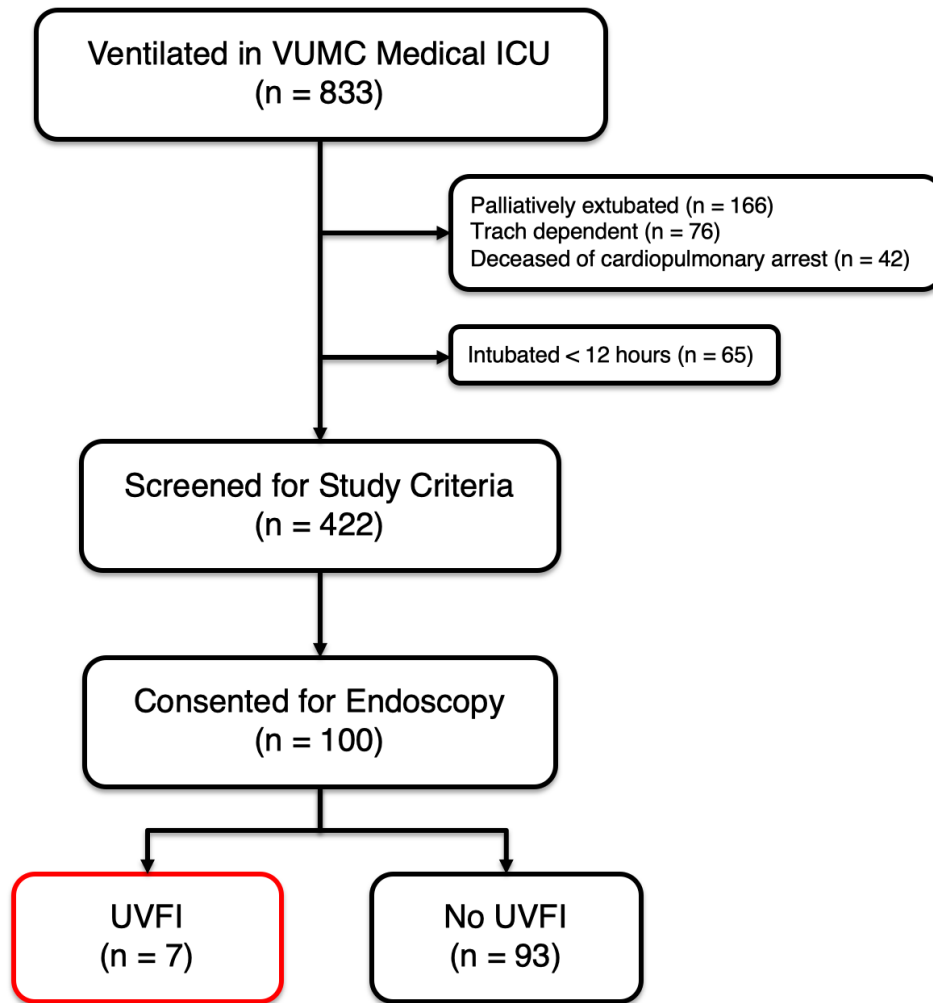

**eFigure.** CONSORT Diagram

| <b>eTable 1. Cohort Characteristics</b>                          |                   | <b>Cohort</b>  |
|------------------------------------------------------------------|-------------------|----------------|
|                                                                  |                   | <b>N = 100</b> |
| <b>Demographics</b>                                              |                   |                |
| Age, years, Median (Range)                                       | 58.5 (19.0-87.0)  |                |
| Sex, male, N                                                     | 62                |                |
| Race, Caucasian, N                                               | 81                |                |
| Height, cm, Median (Range)                                       | 172 (145-191)     |                |
| Weight, kg, Median (Range)                                       | 88.5 (48.0-227)   |                |
| Body Mass Index (BMI), kg/m <sup>2</sup> , Median (Range)        | 30.2 (14.4-77.0)  |                |
| <b>Hospital Course</b>                                           |                   |                |
| Creatinine (Admission), mg/dL, Median (Range) <sup>a</sup>       | 1.07 (0.50-12.0)  |                |
| Creatinine (Extubation), mg/dL, Median (Range)                   | 1.06 (0.45-7.48)  |                |
| Hemoglobin A1c (Admission), %, Median (Range) <sup>b</sup>       | 6.3 (4.2-14.9)    |                |
| Serum Glucose (Admission), mg/dL, Median (Range)                 | 130 (58-1094)     |                |
| Thyroid-Stimulating Hormone, mcU/mL, Median (Range) <sup>c</sup> | 1.27 (0.104-14.3) |                |
| Free Thyroxine, ng/dL, Median (Range) <sup>d</sup>               | 0.93 (0.55-1.36)  |                |
| Red Cell Distribution Width, %, Median (Range)                   | 14.6 (11.1-135)   |                |
| C-Reactive Protein, mg/L, Median (Range) <sup>e</sup>            | 70.3 (2.0-386)    |                |
| Hypotension, N                                                   | 50                |                |
| Vasopressor Requirement, N                                       | 40                |                |
| Acute Kidney Injury, N                                           | 49                |                |
| Systemic Steroids, N                                             | 32                |                |
| Delirium, N                                                      | 68                |                |
| Pneumonia, N                                                     | 37                |                |
| Acute Respiratory Distress Syndrome, N                           | 11                |                |
| Naso-/Orogastric Tube, N                                         | 62                |                |
| <b>Intubation Details</b>                                        |                   |                |
| Length of Intubation, days, Median (Range)                       | 3 (1-18)          |                |
| Endotracheal Tube (ETT) Size, N (%)                              | 7.0               | 15             |
|                                                                  | 7.5               | 40             |
|                                                                  | 8.0               | 45             |
| Mallampati Score, N (%)                                          | 1                 | 28             |
|                                                                  | 2                 | 33             |
|                                                                  | 3                 | 31             |
|                                                                  | 4                 | 6              |
|                                                                  | Unknown           | 2              |
| Laryngeal Exposure, N (%)                                        | 1                 | 58             |

|                              |                            |    |
|------------------------------|----------------------------|----|
|                              | 2                          | 12 |
|                              | 3                          | 3  |
|                              | Unknown                    | 27 |
| Intubation Attempts, N (%)   | 1                          | 60 |
|                              | 2                          | 13 |
|                              | Unknown                    | 27 |
| Intubating Provider, N (%)   | Emergency Department       | 40 |
|                              | Anesthesia                 | 26 |
|                              | Critical Care              | 14 |
|                              | Emergency Medical Services | 10 |
|                              | Outside Hospital & Other   | 10 |
| Prior Intubations, N (%)     |                            | 9  |
| <sup>a</sup> n = 99 patients |                            |    |
| <sup>b</sup> n = 35 patients |                            |    |
| <sup>c</sup> n = 45 patients |                            |    |
| <sup>d</sup> n = 33 patients |                            |    |
| <sup>e</sup> n = 16 patients |                            |    |

| <b>eTable 2.</b> Cohort Health Status and Comorbid Disease | <b>Cohort</b>  |
|------------------------------------------------------------|----------------|
|                                                            | <b>N = 100</b> |
| Myocardial Infarction                                      | 18             |
| Congestive Heart Failure                                   | 28             |
| Peripheral Vascular Disease                                | 13             |
| Dementia                                                   | 6              |
| Chronic Pulmonary Disease                                  | 35             |
| Connective Tissue Disease                                  | 6              |
| Peptic Ulcer Disease                                       | 8              |
| Mild Liver Disease                                         | 5              |
| Moderate or Severe Liver Disease                           | 13             |
| Diabetes without End Organ Damage                          | 27             |
| Diabetes with End Organ Damage                             | 9              |
| Hemiplegia                                                 | 7              |
| Moderate or Severe Renal Disease                           | 16             |
| Tumor without Metastases                                   | 6              |
| Metastatic Solid Tumor                                     | 4              |
| Leukemia                                                   | 3              |
| Lymphoma                                                   | 1              |
| Acquired Immunodeficiency Syndrome                         | 2              |
| <i>Charlson Comorbidity Index, Median (Range)</i>          | 5 (0-13)       |
| Diabetes                                                   | 36             |
| Not Independent                                            | 31             |
| Chronic Obstructive Pulmonary Disease or Pneumonia         | 33             |
| Congestive Heart Failure                                   | 28             |
| Myocardial Infarction                                      | 18             |
| Percutaneous Coronary Intervention, Stent, or Angina       | 15             |
| Hypertension Requiring Medical Therapy                     | 50             |
| Peripheral Vascular Disease or Ischemic Rest Pain          | 13             |
| Impaired Sensorium                                         | 19             |
| Transient Ischemic Attack or Cerebrovascular Accident      | 8              |
| Cerebrovascular Accident with Neurologic Deficit           | 8              |
| <i>Modified Frailty Index Score, Median (Range)</i>        | 0.18 (0-0.91)  |
| Rheumatic Disease                                          | 5              |
| Obstructive Sleep Apnea                                    | 15             |
| Independent                                                | 69             |
| Partially Dependent                                        | 22             |
| Dependent                                                  | 9              |
